# Supplementary material for: Novel Insights into the Potential Diagnostic Value of Circulating Exosomal IncRNA-Related Networks in Large Artery Atherosclerotic Stroke
Source: Front Mol Biosci. 2021 May 21;8:682769. doi: 10.3389/fmolb.2021.682769 (PMC8176956; doi:10.3389/fmolb.2021.682769)
Supplement: Supplementary file 6 [file Table3.XLS]

## Sheet: miRNA聚类
miRNA	log2FoldChange	pvalue
hsa-miR-1273h-3p	1.28485	0.039743
hsa-miR-1277-5p	-1.559	0.00086436
hsa-miR-1296-5p	-1.3287	0.0049648
hsa-miR-136-5p	-1.23313	0.045799
hsa-miR-142-3p	-1.28507	0.03032
hsa-miR-145-3p	-1.24107	0.042577
hsa-miR-1538	-1.44266	0.01645
hsa-miR-1908-5p	-1.21087	0.046189
hsa-miR-204-3p	1.26924	0.024281
hsa-miR-21-5p	-1.36771	0.048141
hsa-miR-27b-5p	1.32464	0.038703
hsa-miR-3127-3p	-1.30202	0.026839
hsa-miR-32-5p	-1.1964	0.0039897
hsa-miR-328-3p	1.31939	0.023328
hsa-miR-342-3p	1.07534	0.04988
hsa-miR-369-3p	-1.4108	0.0026736
hsa-miR-374a-5p	-1.0506	0.0055512
hsa-miR-379-3p	-1.22814	0.046637
hsa-miR-379-5p	-1.24894	0.03994
hsa-miR-381-3p	-1.32589	0.013171
hsa-miR-411-5p	-1.25903	0.035657
hsa-miR-493-3p	-1.31346	0.048373
hsa-miR-494-3p	-1.2992	0.026602
hsa-miR-495-3p	-1.0848	0.012317

## Sheet: Sheet1
sRNA	CK_1	CK_2	CK_3	CK_4	CK_5	LAA_1	LAA_2	LAA_3	LAA_4	LAA_5
hsa-miR-1273h-3p	50.4465	105.582	133.446	77.121	88.9789	107.196	134.777	173.796	90.5096	54.21
hsa-miR-1277-5p	4.38665	46.9252	69.9003	22.0346	66.5463	0	7.48761	0	0	0
hsa-miR-1296-5p	17.5466	23.4626	38.1274	11.0173	22.9857	0	7.48761	0	4.52548	0
hsa-miR-136-5p	13.1599	0	25.4183	49.5778	33.6854	0	0	11.2126	4.52548	3.18883
hsa-miR-142-3p	570.264	3437.27	4016.09	2473.38	436.128	345.411	1175.55	2231.32	1224.14	542.1
hsa-miR-145-3p	32.8999	76.2535	108.028	44.0691	66.7893	11.9107	44.9256	33.6379	36.2038	9.56648
hsa-miR-1538	6.57997	0	0	11.0173	11.6783	0	0	0	0	0
hsa-miR-1908-5p	48.2531	99.7161	133.446	60.595	194.518	83.375	74.8761	95.3075	70.145	25.5106
hsa-miR-204-3p	0	0	0	0	11.9107	23.8214	14.9752	5.60632	15.8392	0
hsa-miR-21-5p	41677.5	82846.5	84503.1	80260.9	8890.99	45570.4	50556.3	64652.1	53226.4	49436.4
hsa-miR-27b-5p	15.3533	17.597	31.7729	0	16.7986	59.5536	29.9504	72.8822	24.8901	31.8883
hsa-miR-3127-3p	4.38665	0	0	5.50864	7.36283	0	0	0	0	0
hsa-miR-32-5p	30.7065	105.582	165.219	77.121	102.785	11.9107	22.4628	22.4253	42.9921	25.5106
hsa-miR-328-3p	76.7663	87.9848	260.537	115.681	219.099	345.411	112.314	151.371	153.866	149.875
hsa-miR-342-3p	144.759	275.686	368.565	148.733	398.984	238.214	314.48	173.796	242.113	194.518
hsa-miR-369-3p	2.19332	17.597	127.091	121.19	109.786	0	0	16.819	4.52548	3.18883
hsa-miR-374a-5p	85.5396	293.283	311.374	236.872	299.736	11.9107	89.8513	140.158	117.662	60.5877
hsa-miR-379-3p	6.57997	5.86565	31.7729	27.5432	10.7893	0	0	0	4.52548	6.37765
hsa-miR-379-5p	129.406	140.776	457.529	440.691	489.647	83.375	112.314	207.434	181.019	121.175
hsa-miR-381-3p	418.925	434.058	1417.07	1740.73	378.823	273.946	284.529	583.058	558.897	392.226
hsa-miR-411-5p	37.2865	93.8504	285.956	198.311	264.347	47.6429	97.3389	44.8506	79.1959	41.4547
hsa-miR-493-3p	364.092	158.373	495.657	798.753	678.385	238.214	262.066	274.71	309.995	140.308
hsa-miR-494-3p	26.3199	82.1191	146.155	159.751	132.837	35.7322	52.4133	61.6696	36.2038	25.5106
hsa-miR-495-3p	105.28	146.641	527.43	578.407	543.274	35.7322	97.3389	207.434	169.706	35.0771

## Sheet: Sheet2
miR-1273h-3p
miR-1277-5p
miR-1296-5p
miR-136-5p
miR-142-3p
miR-145-3p
miR-1538
miR-1908-5p
miR-204-3p
miR-21-5p
miR-27b-5p
miR-3127-3p
miR-32-5p
miR-328-3p
miR-342-3p
miR-369-3p
miR-374a-5p
miR-379-3p
miR-379-5p
miR-381-3p
miR-411-5p
miR-493-3p
miR-494-3p
miR-495-3p
